# Supplementary material for: TRPM7 maintains progenitor-like features of neuroblastoma cells: implications for metastasis formation
Source: PubMed Central journal article supplement (PMC4496182; doi:10.18632/oncotarget.3315), 2015-03-05
Supplement: oncotarget-06-8760-s001.pdf [file oncotarget-06-8760-s001.pdf]

## SUPPLEMENTARY FIGURES AND TABLES

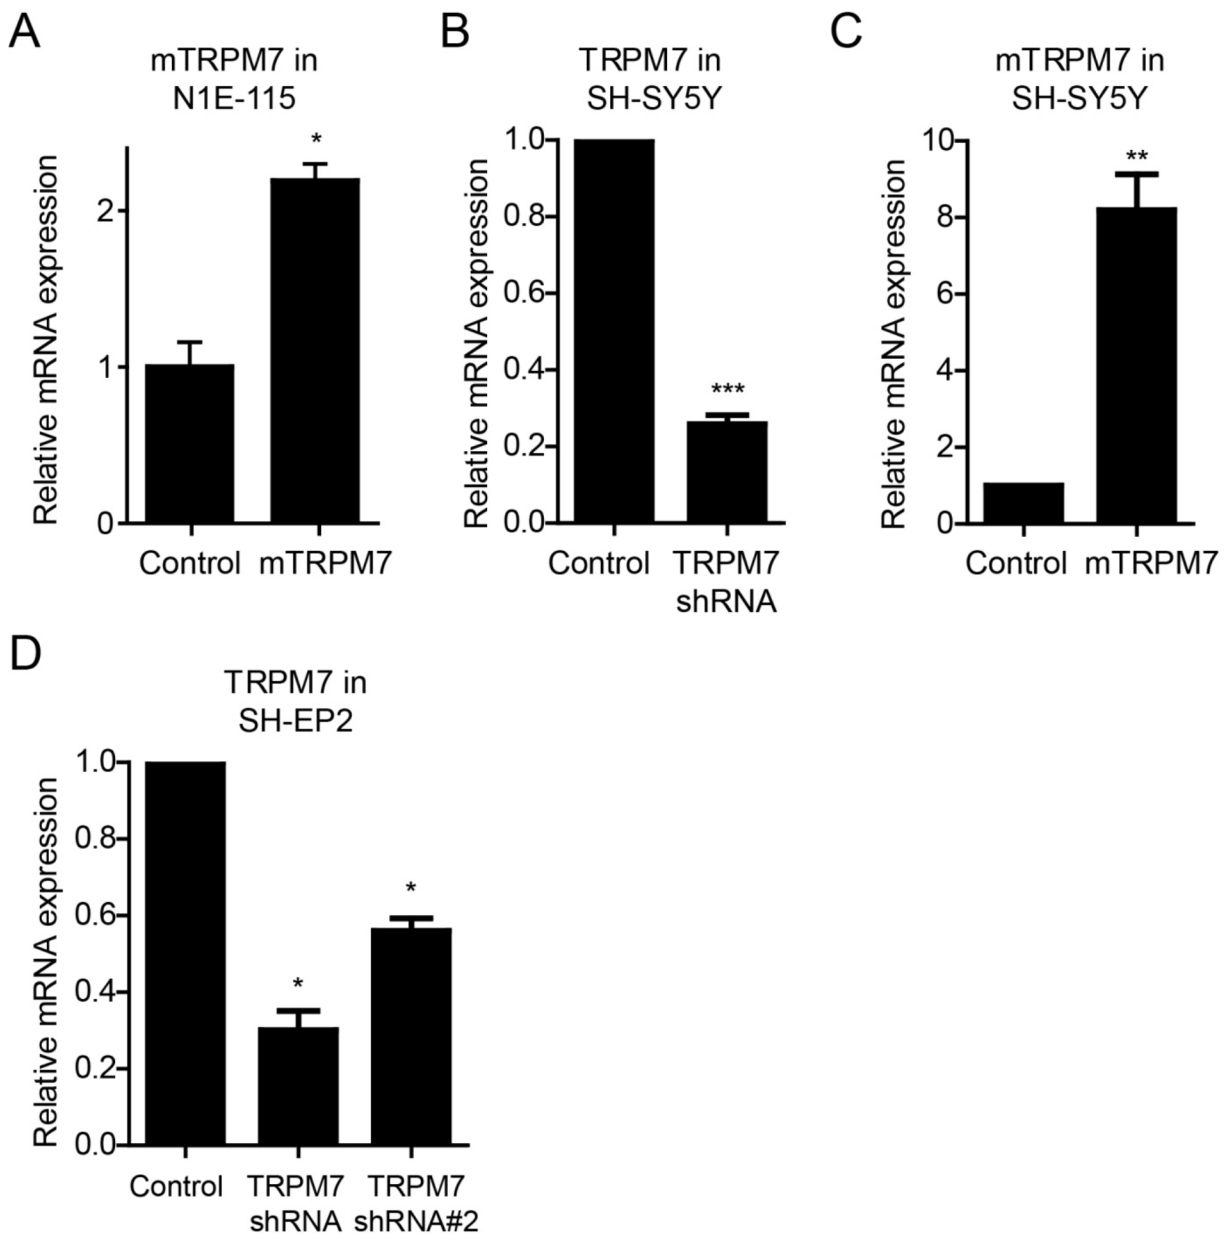

**Supplementary Figure S1: Manipulation of TRPM7 expression in mouse N1E-115 cells, and human SH-SY5Y and SH-EP2 cells.** (A) Mouse TRPM7 mRNA expression in mouse N1E-115 control and mTRPM7 overexpressing cells, determined by quantitative RT-PCR. Mouse TRPM7 expression in the control cells is set to one. Data is mean  $\pm$  SEM of  $n = 2$  independent experiments. (B) Human TRPM7 mRNA expression in human SH-SY5Y control and TRPM7 shRNA cells, determined by quantitative RT-PCR. Human TRPM7 expression in the control cells is set to one. Data is mean  $\pm$  SEM of  $n = 6$  independent experiments. (C) Mouse TRPM7 mRNA expression in human SH-SY5Y control and mTRPM7 overexpressing cells, determined by quantitative RT-PCR. Mouse TRPM7 expression in the control cells is set to one. Data is mean  $\pm$  SEM of  $n = 3$  independent experiments. (D) Human TRPM7 mRNA expression in human SH-EP2 control, TRPM7 shRNA and TRPM7 shRNA#2 cells, determined by quantitative RT-PCR. Human TRPM7 expression in the control cells is set to one. Data is mean  $\pm$  SEM of  $n = 2$  independent experiments. \* $p < 0.05$ , \*\* $p < 0.01$ , \*\*\* $p < 0.001$ .

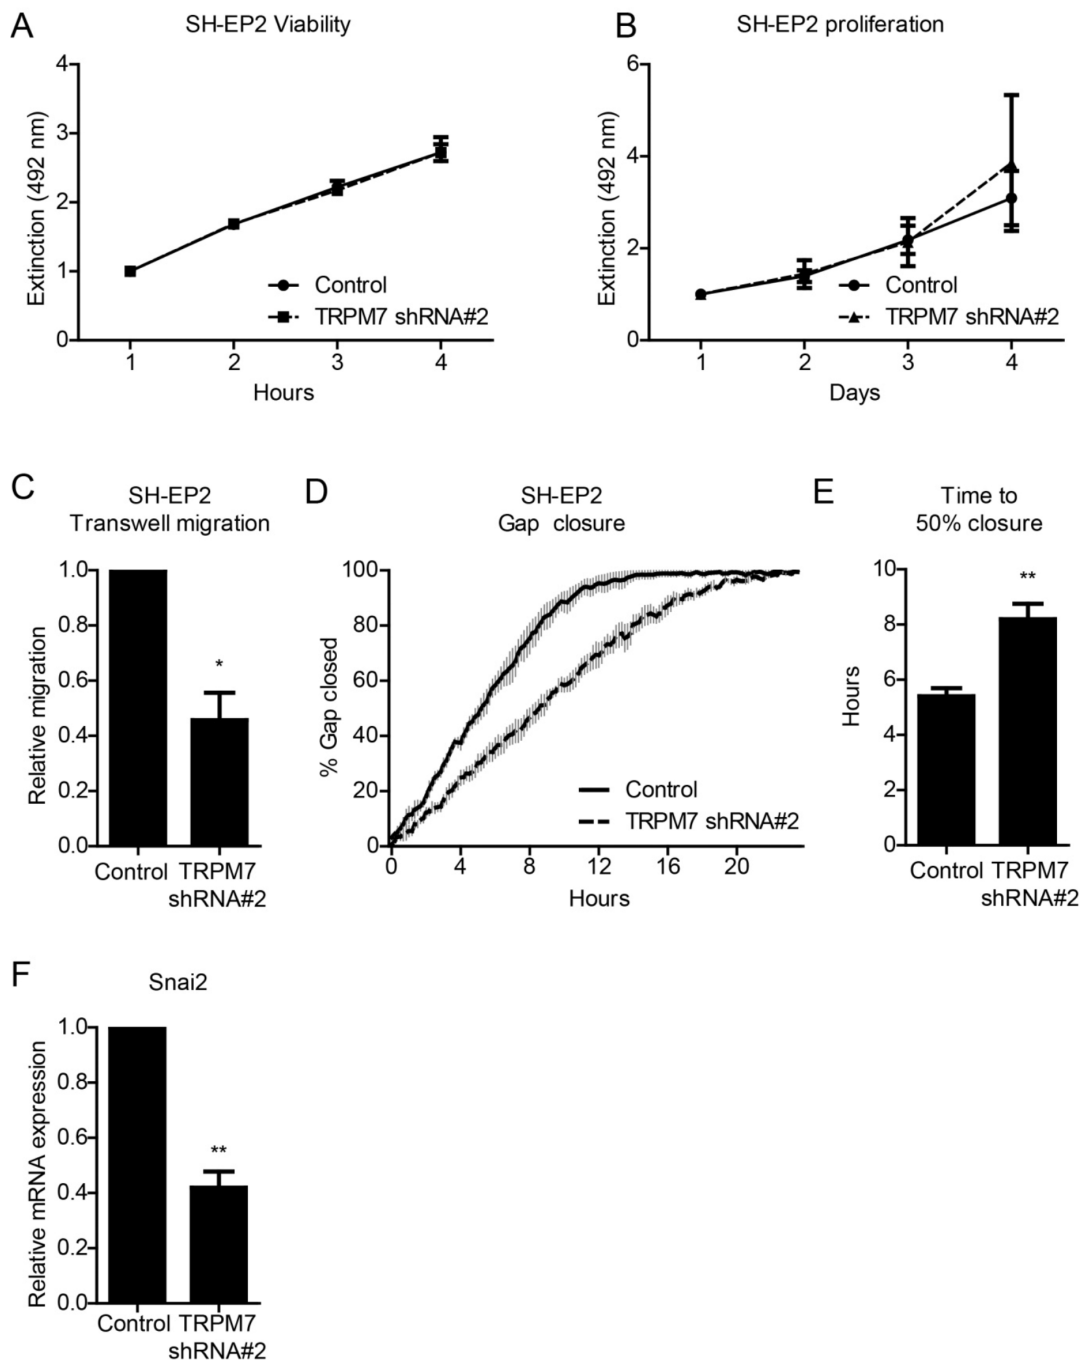

**Supplementary Figure S2: TRPM7 shRNA#2 reduces SH-EP2 cell migration and SNAI2 mRNA expression, but not cell viability and proliferation.** (A) & (B) Effect of TRPM7 shRNA#2 on viability and proliferation of SH-EP2 cells. Quantification of cell viability and proliferation, determined by MTS assays. Viability was assessed over 4 hours, proliferation was assessed over 4 days. Data represents normalized mean extinction at 492 nm mean  $\pm$  SEM of  $n = 2$  experiments performed in triplo. (C) Transwell migration of SH-EP2 control and TRPM7 shRNA#2 cells. Equal numbers of cells were allowed to migrate towards a serum gradient for 24 hours. Data are normalized to control and represent mean  $\pm$  SEM of  $n = 3$  independent experiments performed in duplicate. (D) Gap closure over time, presented as percentage of gap size at time point 0 hours. (E) Quantification of time to 50% gap closure. Data in (D) and (E) represent mean  $\pm$  SEM from  $n = 3$  independent experiments, each performed in duplicate. (F) TRPM7 shRNA#2 reduces SNAI2 mRNA expression levels in SH-EP2 cells, as determined by quantitative RT-PCR. Data represents mean expression levels  $\pm$  SEM ( $n = 3$ ) that are normalized to GAPDH housekeeping gene expression. SNAI2 expression in control cells is set to one. \* $p < 0.05$ , \*\* $p < 0.01$ , two-tailed unpaired  $t$ -test.

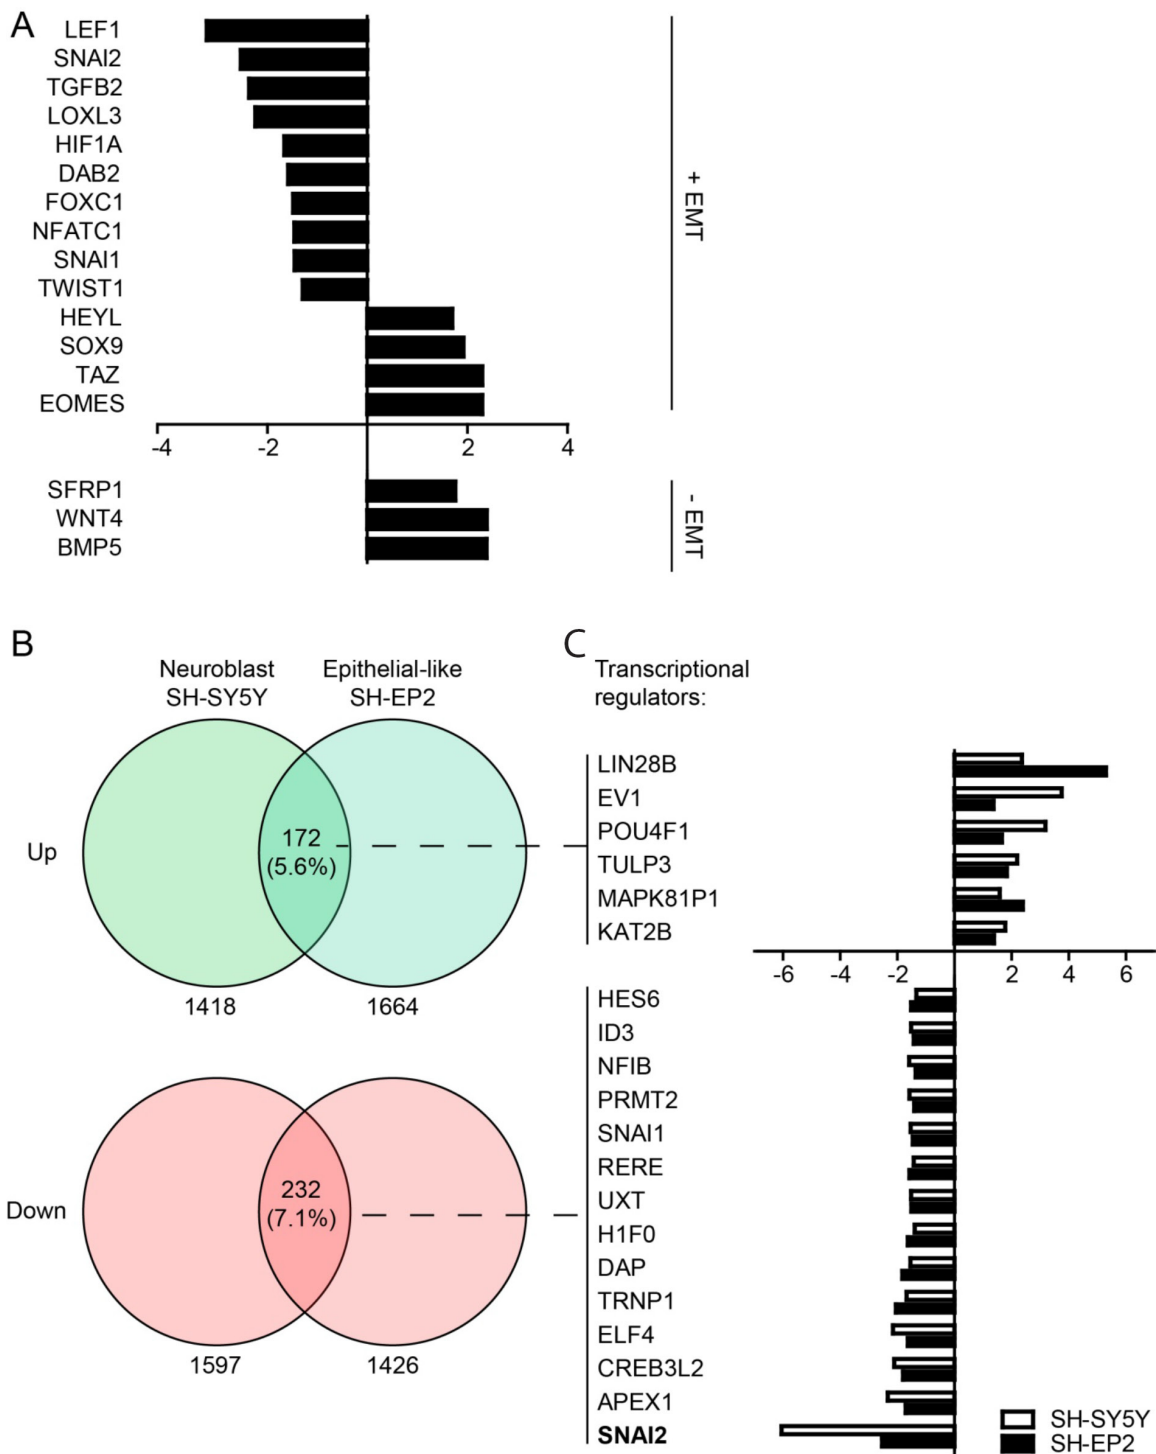

**Supplementary Figure S3: TRPM7 shRNA reduces expression of EMT transcription factors in SH-EP2 cells.** (A) TRPM7 shRNA induces a partial mesenchymal to epithelial transition in SH-EP2 human neuroblastoma cells. Selection of differentially regulated genes within the ‘Epithelial to mesenchymal transition’ category, that are known to positively (+) or negatively (-) associate with epithelial to mesenchymal transition in neural crest and neuroblastoma cells. X-axis represents fold difference in normalized expression levels between control and TRPM7 shRNA cells. (B) Overlap in differentially expressed genes in neuroblastic SH-SY5Y and epithelial-like SH-EP2 cells. (C) Transcriptional regulators that are up or down regulated in both neuroblastic SH-SY5Y and epithelial-like SH-EP2 cells. X-axis represents fold difference in normalized expression levels between control and TRPM7 shRNA cells.

**Supplementary Table S1: GO-term analysis on TRPM7 shRNA affected genes in SH-SY5Y cells**

GO-term analysis using Webgestalt yields 40 significantly enriched categories (*P*). Fold enrichment is the ratio between observed and expected genes within a category. Number of expected genes is based on the number of protein encoding genes within a category.

| GO-term                                                  | Observed | Expected | Fold enrichment | <i>P</i> |
|----------------------------------------------------------|----------|----------|-----------------|----------|
| multicellular organismal development                     | 476      | 378.16   | 1.26            | 8.44e-07 |
| developmental process                                    | 523      | 424.07   | 1.23            | 8.44e-07 |
| system development                                       | 416      | 326.59   | 1.27            | 1.56e-06 |
| anatomical structure development                         | 463      | 373.80   | 1.24            | 4.61e-06 |
| multicellular organismal process                         | 613      | 523.51   | 1.17            | 2.55e-05 |
| single-multicellular organism process                    | 610      | 520.54   | 1.17            | 2.55e-05 |
| nervous system development                               | 217      | 159.91   | 1.36            | 0.0001   |
| cell morphogenesis involved in differentiation           | 104      | 65.30    | 1.59            | 0.0002   |
| anatomical structure morphogenesis                       | 247      | 190.61   | 1.30            | 0.0005   |
| glycosaminoglycan biosynthetic process                   | 25       | 9.28     | 2.70            | 0.0005   |
| aminoglycan biosynthetic process                         | 25       | 9.37     | 2.67            | 0.0005   |
| blood vessel development                                 | 76       | 45.64    | 1.67            | 0.0006   |
| tissue development                                       | 182      | 134.40   | 1.35            | 0.0007   |
| chondroitin sulfate proteoglycan metabolic process       | 17       | 5.19     | 3.27            | 0.0007   |
| neuron projection morphogenesis                          | 86       | 54.08    | 1.59            | 0.0008   |
| anatomical structure formation involved in morphogenesis | 196      | 147.85   | 1.33            | 0.0011   |
| neuron differentiation                                   | 131      | 91.83    | 1.43            | 0.0011   |
| cell morphogenesis involved in neuron differentiation    | 84       | 53.33    | 1.57            | 0.0012   |
| chondroitin sulfate metabolic process                    | 16       | 5.01     | 3.19            | 0.0013   |
| cell proliferation                                       | 190      | 143.58   | 1.32            | 0.0013   |
| cell adhesion                                            | 126      | 88.49    | 1.42            | 0.0014   |
| biological adhesion                                      | 126      | 88.67    | 1.42            | 0.0015   |
| cell-cell adhesion                                       | 63       | 37.47    | 1.68            | 0.0015   |
| neuron projection development                            | 98       | 65.30    | 1.50            | 0.0015   |
| vasculature development                                  | 76       | 47.95    | 1.58            | 0.0017   |
| axonogenesis                                             | 77       | 48.79    | 1.58            | 0.0017   |
| organ development                                        | 291      | 236.71   | 1.23            | 0.0019   |
| cell differentiation                                     | 302      | 247.19   | 1.22            | 0.0020   |
| response to chemical stimulus                            | 310      | 254.70   | 1.22            | 0.0020   |
| cell-cell junction organization                          | 26       | 11.50    | 2.26            | 0.0025   |
| spinal cord motor neuron differentiation                 | 10       | 2.41     | 4.15            | 0.0026   |
| cell morphogenesis                                       | 122      | 87.65    | 1.39            | 0.0030   |
| cell projection organization                             | 120      | 86.63    | 1.39            | 0.0030   |

(Continued)

|                                              |     |        |      |        |
|----------------------------------------------|-----|--------|------|--------|
| negative regulation of developmental process | 76  | 49.99  | 1.52 | 0.0030 |
| cellular developmental process               | 314 | 262.40 | 1.20 | 0.0030 |
| cell differentiation in spinal cord          | 13  | 3.99   | 3.26 | 0.0030 |
| cell part morphogenesis                      | 93  | 64.09  | 1.45 | 0.0030 |
| cell development                             | 176 | 135.51 | 1.30 | 0.0030 |
| neurogenesis                                 | 142 | 105.74 | 1.34 | 0.0030 |
| glycosaminoglycan metabolic process          | 29  | 13.82  | 2.10 | 0.0030 |

### Supplementary Table S2: GO-term analysis on TRPM7 shRNA affected genes in SH-EP2 cells

GO-term analysis using Webgestalt yields 40 significantly enriched categories (P). Fold enrichment is the ratio between observed and expected genes within a category. Number of expected genes is based on the number of protein encoding genes within a category. Categories that were also found enriched in SH-SY5Y TRPM7 shRNA cells (Supplementary Table S1) are indicated in grey.

| GO-term                                     | Observed | Expected | Fold enrichment | P        |
|---------------------------------------------|----------|----------|-----------------|----------|
| response to wounding                        | 183      | 118.47   | 1.54            | 2.59e-07 |
| circulatory system development              | 135      | 80.62    | 1.67            | 2.59e-07 |
| vasculature development                     | 103      | 55.28    | 1.86            | 2.59e-07 |
| cardiovascular system development           | 135      | 80.62    | 1.67            | 2.59e-07 |
| cellular component movement                 | 192      | 126.81   | 1.51            | 3.04e-07 |
| blood vessel development                    | 96       | 52.60    | 1.82            | 7.05e-07 |
| blood vessel morphogenesis                  | 86       | 46.30    | 1.86            | 1.74e-06 |
| response to external stimulus               | 204      | 141.46   | 1.44            | 3.28e-06 |
| renal system development                    | 57       | 26.94    | 2.12            | 4.77e-06 |
| single-multicellular organism process       | 696      | 598.64   | 1.16            | 8.11e-06 |
| multicellular organismal process            | 699      | 602.07   | 1.16            | 8.58e-06 |
| response to lipid                           | 104      | 62.23    | 1.67            | 9.64e-06 |
| urogenital system development               | 62       | 31.22    | 1.99            | 9.89e-06 |
| regulation of response to external stimulus | 74       | 40.20    | 1.84            | 1.42e-05 |
| angiogenesis                                | 71       | 38.17    | 1.86            | 1.56e-05 |
| cell migration                              | 137      | 89.81    | 1.53            | 1.94e-05 |
| wound healing                               | 108      | 66.93    | 1.61            | 2.41e-05 |
| locomotion                                  | 188      | 133.01   | 1.41            | 2.49e-05 |
| cell motility                               | 145      | 97.19    | 1.49            | 2.62e-05 |
| localization of cell                        | 145      | 97.19    | 1.49            | 2.62e-05 |
| system development                          | 456      | 376.04   | 1.21            | 3.59e-05 |
| anatomical structure morphogenesis          | 285      | 219.61   | 1.30            | 4.32e-05 |
| response to organic cyclic compound         | 100      | 61.91    | 1.62            | 4.74e-05 |
| single-organism process                     | 904      | 815.69   | 1.11            | 6.43e-05 |

(Continued)

|                                          |     |        |      |          |
|------------------------------------------|-----|--------|------|----------|
| kidney development                       | 46  | 22.24  | 2.07 | 7.23e-05 |
| developmental process                    | 570 | 487.66 | 1.17 | 8.14e-05 |
| response to molecule of bacterial origin | 48  | 24.06  | 2.00 | 9.64e-05 |
| regulation of cell motility              | 76  | 44.59  | 1.70 | 9.64e-05 |
| cell adhesion                            | 147 | 101.68 | 1.45 | 9.64e-05 |
| circulatory system process               | 64  | 35.50  | 1.80 | 9.64e-05 |
| biological adhesion                      | 147 | 101.89 | 1.44 | 9.64e-05 |
| regulation of localization               | 194 | 141.78 | 1.37 | 9.64e-05 |
| regulation of cell migration             | 73  | 42.23  | 1.73 | 9.64e-05 |
| epithelial to mesenchymal transition     | 23  | 8.13   | 2.83 | 0.0001   |
| ERK1 and ERK2 cascade                    | 32  | 13.79  | 2.32 | 0.0001   |
| system process                           | 237 | 180.91 | 1.31 | 0.0001   |
| anatomical structure development         | 507 | 430.25 | 1.18 | 0.0001   |
| regulation of locomotion                 | 80  | 47.90  | 1.67 | 0.0001   |
| regulation of body fluid levels          | 100 | 63.72  | 1.57 | 0.0001   |
| blood circulation                        | 63  | 35.39  | 1.78 | 0.0001   |

**Supplementary Table S3: TRPM7 does not correlate with disease stage and progression in neuroblastoma patients**

R indicates correlation coefficient. P indicates significance of correlations. Statistical significant correlations ( $p < 0.05$ ), are indicated in red. Analysis on patient datasets were performed using R2 (<http://r2.amc.nl>).

| Dataset     | Subcohort | #Patients | TRPM7 vs MYCN mRNA |        | TRPM7 vs MYCN status |        | TRPM7 vs Stage |        | TRPM7 vs Relapse |        | TRPM7 vs Survival |      |
|-------------|-----------|-----------|--------------------|--------|----------------------|--------|----------------|--------|------------------|--------|-------------------|------|
|             |           |           | R                  | P      | R                    | P      | R              | P      | R                | P      | R                 | P    |
|             |           |           | Hiyama             | total  | 51                   | -0.328 | 0.02           | -0.243 | 0.09             | -0.105 | 0.46              |      |
|             | mycn-neg  | 44        |                    |        |                      |        | 0.03           | 0.84   |                  |        | 0.012             | 0.94 |
|             | mycn-pos  | 7         |                    |        |                      |        | 0.143          | 0.76   |                  |        | 0.101             | 0.83 |
| Jagannathan | total     | 100       | 0.259              | 0.0093 | 0.055                | 0.59   | -0.09          | 0.37   |                  |        |                   |      |
|             | mycn-neg  | 78        |                    |        |                      |        | -0.093         | 0.42   |                  |        |                   |      |
|             | mycn-pos  | 22        |                    |        |                      |        | -0.228         | 0.31   |                  |        |                   |      |
| Kocak       | total     | 649       | 0.115              | 0.0035 | 0.127                | 0.0012 | 0.002          | 0.97   |                  |        |                   |      |
|             | mycn-neg  | 550       |                    |        |                      |        | -0.025         | 0.56   |                  |        |                   |      |
|             | mycn-pos  | 93        |                    |        |                      |        | -0.186         | 0.07   |                  |        |                   |      |
|             | n.s.      | 6         |                    |        |                      |        |                |        |                  |        |                   |      |
| Lastowska   | total     | 30        | 0.181              | 0.34   | 0.138                | 0.47   | 0.072          | 0.7    |                  |        |                   |      |
|             | mycn-neg  | 20        |                    |        |                      |        | 0.004          | 0.99   |                  |        |                   |      |

(Continued)

|          |          |      |       |       |       |      |       |      |        |         |        |      |
|----------|----------|------|-------|-------|-------|------|-------|------|--------|---------|--------|------|
|          | mycn-pos | 10   |       |       |       |      |       |      |        |         |        |      |
| Seeger   | total    | 117  | 0.299 | 0.001 |       |      |       |      | 0.333  | 0.00024 |        |      |
|          | mycn-neg | n.s. |       |       |       |      |       |      |        |         |        |      |
|          | mycn-pos | n.s. |       |       |       |      |       |      |        |         |        |      |
|          |          |      |       |       |       |      |       |      |        |         |        |      |
| Versteeg | total    | 88   | -0.06 | 0.58  | 0.171 | 0.11 | 0.129 | 0.23 | 0.056  | 0.61    | 0.029  | 0.79 |
|          | mycn-neg | 72   |       |       |       |      | 0.046 | 0.7  | 0.012  | 0.92    | -0.038 | 0.75 |
|          | mycn-pos | 16   |       |       |       |      | 0.216 | 0.42 | -0.371 | 0.16    | -0.371 | 0.16 |
